# Supplementary material
Source: PubMed Central journal article supplement (PMC3234802)
Supplement: supp_M111.286104_jbc.M111.286104-1.pdf [file supp_M111.286104_jbc.M111.286104-1.pdf]

SUPPLEMENTARY DATA:

**Table S1:** Steady state concentrations of Pex18p after treatment with cycloheximid. Signal intensities of Pex18p in indicated cells were quantified by densitometry and are given as percentage of the starting concentration at time-point t=0h. Standard error of mean was estimated by two independent experiments.

| Strain         | CHX (h)    |                           |                          |                          |                          |                          |                          |
|----------------|------------|---------------------------|--------------------------|--------------------------|--------------------------|--------------------------|--------------------------|
|                | 0          | 1                         | 2                        | 3                        | 4                        | 5                        | 6                        |
| wild-type      | <b>100</b> | <b>27.8</b><br>(+/- 1.4)  | <b>5.3</b><br>(+/- 2.2)  | <b>1.4</b><br>(+/- 0.9)  | <b>0.6</b><br>(+/- 0.2)  | <b>0</b><br>(+/- 0.1)    | <b>0</b><br>(+/- 0.2)    |
| <i>fox3Δ</i>   | <b>100</b> | <b>21.5</b><br>(+/- 5.49) | <b>4.0</b><br>(+/- 2.8)  | <b>4.7</b><br>(+/- 0.5)  | <b>4.7</b><br>(+/- 1.2)  | <b>0.3</b><br>(+/- 0.1)  | <b>0</b><br>(+/- 0.1)    |
| <i>pex7Δ</i>   | <b>100</b> | <b>16.9</b><br>(+/- 4.9)  | <b>14.8</b><br>(+/- 0.8) | <b>8.2</b><br>(+/- 0.8)  | <b>10.2</b><br>(+/- 2.6) | <b>0</b><br>(+/- 0.9)    | <b>0</b><br>(+/- 0.2)    |
| <i>pex13Δ</i>  | <b>100</b> | <b>86.6</b><br>(+/- 1.4)  | <b>85.8</b><br>(+/- 3.2) | <b>79.8</b><br>(+/- 4.6) | <b>80.2</b><br>(+/- 4.0) | <b>55.4</b><br>(+/- 3.6) | <b>66.1</b><br>(+/- 0.9) |
| <i>pex1Δ6Δ</i> | <b>100</b> | <b>89.5</b><br>(+/- 0.1)  | <b>68.8</b><br>(+/- 1.7) | <b>79.0</b><br>(+/- 2.8) | <b>57.1</b><br>(+/- 4.9) | <b>40.3</b><br>(+/- 9.3) | <b>57.0</b><br>(+/- 6.5) |
| <i>pex3Δ</i>   | <b>100</b> | <b>66.6</b><br>(+/- 4.7)  | <b>51.6</b><br>(+/- 9.5) | <b>61.8</b><br>(+/- 5.8) | <b>53.4</b><br>(+/- 9.2) | <b>58.0</b><br>(+/- 3.9) | <b>44.9</b><br>(+/- 1.2) |

**Table S2:** Steady state concentrations of Pex18p-variants after treatment with cycloheximid. Signal intensities of Pex18p-variants in indicated cells were quantified by densitometry and are given as percentage of starting concentration at time-point t=0h. Standard error of mean was estimated by two independent experiments.

| Strain                                 | CHX (h)    |                          |                           |                           |                          |
|----------------------------------------|------------|--------------------------|---------------------------|---------------------------|--------------------------|
|                                        | 0          | 1                        | 2                         | 3                         | 4                        |
| Wild-type                              | <b>100</b> | <b>43</b><br>+/- 5.2)    | <b>10</b><br>(+/- 14.1)   | <b>0</b><br>(+/- 2.2)     | <b>0</b><br>(+/- 3.1)    |
| <i>pex18Δ/21Δ</i><br>Pex18p            | <b>100</b> | <b>19.5</b><br>(+/- 7.7) | <b>3.5</b><br>(+/- 0.7)   | <b>5</b><br>(+/- 5.6)     | <b>2</b><br>(+/- 2.8)    |
| <i>pex18Δ/21Δ</i><br>Pex18pK13R        | <b>100</b> | <b>80</b><br>(+/- 12.2)  | <b>40</b><br>(+/- 13.1)   | <b>21</b><br>(+/- 12.6)   | <b>8</b><br>(+/- 8.4)    |
| <i>pex18Δ/21Δ</i><br>Pex18pK20R        | <b>100</b> | <b>28.5</b><br>(+/- 0.7) | <b>4.5</b><br>(+/- 3.5)   | <b>5.5</b><br>(+/- 6.3)   | <b>3.5</b><br>(+/- 4.9)  |
| <i>pex18Δ/21Δ</i><br>Pex18pK13/2<br>OR | <b>100</b> | <b>75.6</b><br>(+/- 2.1) | <b>61</b><br>(+/- 5.6)    | <b>57</b><br>(+/- 12.7)   | <b>60.5</b><br>(+/- 0.7) |
| <i>pex18Δ/21Δ</i><br>Pex18pC6S         | <b>100</b> | <b>60.5</b><br>(+/- 4.9) | <b>49.5</b><br>(+/- 10.6) | <b>21.5</b><br>(+/- 16.2) | <b>10</b><br>(+/- 14.1)  |
